# Supplementary material for: A new approach methodology to identify tumorigenic chemicals using short-term exposures and transcript profiling
Source: Front Toxicol. 2024 Oct 17;6:1422325. doi: 10.3389/ftox.2024.1422325 (PMC11526388; doi:10.3389/ftox.2024.1422325)
Supplement: Supplementary file 1 [file Table2.xlsx]

## Sheet: File S1
Common Chemical Name (Abbreviation used in the study)	CASRN	DTXSID	Dose level used in the study (mg/kg/day)	Days of treatment	Dose Classification	Lowest tumorigenic dose (mg/kg/day)	Highest non-tumorigenic dose (mg/kg/day)	Source
Acetochlor	34256-82-1	DTXSID8023848	250	4	1	250	69	https://www3.epa.gov/pesticides/chem_search/cleared_reviews/csr_PC-121601_27-Sep-91_081.pdf
Ametryn	834-12-8	DTXSID1023869	176	4	1	176	26.2	https://echa.europa.eu/registration-dossier/-/registered-dossier/2171/7/8
Di(2-ethylhexyl) phthalate	117-81-7	DTXSID5020607	600	4	1	99	19.8	https://ntp.niehs.nih.gov/sites/default/files/ntp/htdocs/lt_rpts/tr601_508.pdf
Estragole	140-67-0	DTXSID0020575	600	4	1	600		https://ntp.niehs.nih.gov/sites/default/files/ntp/htdocs/st_rpts/tox082.pdf
N,N-dimethyl-p-toluidine	99-97-8	DTXSID0021832	60	4	1	60	20	https://ntp.niehs.nih.gov/sites/default/files/ntp/htdocs/lt_rpts/tr579_508.pdf
Perfluorooctanoic Acid	335-67-1	DTXSID8031865	15	4	1	4	1.9	https://ntp.niehs.nih.gov/sites/default/files/ntp/htdocs/lt_rpts/tr598_508.pdf
Pirixinic acid (WY-14,643)	50892-23-4	DTXSID4020290	10	4	1	10		https://carcdb.lhasalimited.org/study-information/44572453
Tebufenpyrad	119168-77-3	DTXSID0034223	17	4	1	6.5		https://efsa.onlinelibrary.wiley.com/doi/pdf/10.2903/j.efsa.2009.192r
Vinclozolin	50471-44-8	DTXSID4022361	225	4	1	225	83	https://www.inchem.org/documents/jmpr/jmpmono/v95pr18.htm
Carbaryl	63-25-2	DTXSID9020247	100	4	2	500	100	https://carcdb.lhasalimited.org/
Cyfluthrin	68359-37-5	DTXSID5035957	23	4	2		23	https://www3.epa.gov/pesticides/chem_search/cleared_reviews/csr_PC-128831_14-Mar-86_a.pdf
Cyprodinil	121552-61-2	DTXSID1032359	74	4	2		73.6	https://www3.epa.gov/pesticides/chem_search/reg_actions/registration/fs_PC-288202_06-Apr-98.pdf
Indoxacarb	173584-44-6	DTXSID1032690	10	4	2		10	http://www.inchem.org/documents/jmpr/jmpmono/v2005pr13.pdf
Simazine	122-34-9	DTXSID4021268	63	4	2		1000	https://www.ncbi.nlm.nih.gov/books/NBK402101/
2,5-Pyridinedicarboxylic acid, dipropyl ester	136-45-8	DTXSID8032544	600	4	3	1000	500	https://pubchem.ncbi.nlm.nih.gov/compound/Dipropyl-isocinchomeronate#section=Toxicity-Summary
Bisphenol A	80-05-7	DTXSID7020182	450	4	3		95.4	https://carcdb.lhasalimited.org/
Cyclanilide	113136-77-9	DTXSID5032600	58.6	4	3		43.1	https://www.govinfo.gov/content/pkg/FR-1997-05-23/html/97-13645.htm
Ethyl methanesulfonate	62-50-0	DTXSID6025309	200	4	3			No results available
Flusilazole	85509-19-9	DTXSID3024235	13	4	3			No results available
Flutamide	13311-84-7	DTXSID7032004	10	4	3		50	https://www.accessdata.fda.gov/drugsatfda_docs/nda/2001/18554_S021.pdf
Lipopolysaccharride (LPS)	NOCAS_36695	DTXSID4036695	2	4	3			No results available
Triclosan	3380-34-5	DTXSID5032498	1000	4	3		127	https://echa.europa.eu/registration-dossier/-/registered-dossier/12675/7/8

## Sheet: File S2
Chemical	Abbreviation	CASRN	DTXSID#	Dose levels (mg/kg/day)	Highest nontumorigenic dose	Lowest tumorigenic dose	Dose Classification (in order of dosing order)	Source
Acrylamide	ACR	79-06-1	DTXSID5020027	0.075, 0.156, 0.3125, 0.625, 1.25, 2.5, 5, 10	2.7		2,2,2,2,2,3,3,3	https://ntp.niehs.nih.gov/sites/default/files/ntp/htdocs/lt_rpts/tr575_508.pdf
Bromodichloroacetic acid	BDCA	71133-14-7	DTXSID4024644	1.25, 2.5, 5, 10, 20, 40, 80, 160	43		2,2,2,2,2,3,3,3	https://ntp.niehs.nih.gov/sites/default/files/ntp/htdocs/lt_rpts/tr583_508.pdf
Coumarin	COU	91-64-5	DTXSID7020348	3.125, 6.25, 12.5, 25, 50, 100, 200, 400	71.4	200	2,2,2,2,2,3,1,1	https://ntp.niehs.nih.gov/sites/default/files/ntp/htdocs/lt_rpts/tr422.pdf; https://pubmed.ncbi.nlm.nih.gov/8812259/
Di(2-ethylhexyl) phthalate	DEHP	117-81-7	DTXSID5020607	8, 16, 31.25, 62.5, 125, 250, 500, 1000	19.8	99	2,2,3,3,1,1,1,1	https://ntp.niehs.nih.gov/sites/default/files/ntp/htdocs/lt_rpts/tr601_508.pdf
Pentabromodiphenyl ether mixture	DE71	32534-81-9	DTXSID2024246	0.38, 0.75, 1.5, 3, 15, 50, 100, 200, 500	15	50	2,2,2,2,1,1,1,1	https://ntp.niehs.nih.gov/sites/default/files/ntp/htdocs/lt_rpts/tr589_508.pdf
Ethinyl estradiol	EE2	57-63-6	DTXSID5020576	0.02, 0.067, 0.2, 0.6, 1.8, 5.4, 16.2, 48.6		0.429	3,3,3,1,1,1,1,1	https://pubmed.ncbi.nlm.nih.gov/8603471/
Fenofibrate	FEN	49562-28-9	DTXSID2029874	8, 16, 31.25, 62.5, 125, 250, 500, 1000	10	45	2,3,3,1,1,1,1,1	https://www.pharmapendium.com/browse/fda/Fenofibrate/
Furan	FUR	110-00-9	DTXSID6020646	0.125, 0.25, 0.5, 1, 2, 4, 8, 16		1.4	2,2,2,2,2,3,1,1	https://ntp.niehs.nih.gov/sites/default/files/ntp/htdocs/lt_rpts/tr402.pdf
Hexachlorobenzene	HCB	118-74-1	DTXSID2020682	0.004, 0.015, 0.0625, 0.25, 1, 4, 16, 64	1.6	5	2,2,2,2,2,3,1,1	https://pubmed.ncbi.nlm.nih.gov/4043882/; https://www.sciencedirect.com/science/article/abs/pii/0304383580901081
Methyl eugenol	MET	93-15-2	DTXSID5025607	4.625, 9.25, 18.5, 37, 75, 150, 300, 600		26.4	3,3,3,1,1,1,1,1	https://ntp.niehs.nih.gov/sites/default/files/ntp/htdocs/lt_rpts/tr491.pdf
Perfluorooctanoic acid	PFOA	335-67-1	DTXSID8031865	0.156, 0.3125, 0.625, 1.25, 2.5, 5, 10, 20		2.2	3,3,3,3,1,1,1,1	https://ntp.niehs.nih.gov/sites/default/files/ntp/htdocs/lt_rpts/tr598_508.pdf
Pulegone	PUL	89-82-7	DTXSID2025975	2.4, 4.7, 9.4, 18.75, 37.5, 75, 150, 300	37.5		2,2,2,2,2,3,3,3	https://ntp.niehs.nih.gov/sites/default/files/ntp/htdocs/lt_rpts/tr563.pdf
Tetrabromobisphenol A	TBBPA	79-94-7	DTXSID1026081	4, 8, 16, 31.25, 62.5, 125, 250, 500, 1000, 2000	1000		2,2,2,2,2,2,2,2,2,3	https://ntp.niehs.nih.gov/sites/default/files/ntp/htdocs/lt_rpts/tr587_508.pdf
3,3′,4,4′-Tetrachloroazobenzene	TCAB	14047-09-7	DTXSID6026086	0.1, 0.3, 1, 3, 10, 30, 100, 200, 400	10	100	2,2,2,2,2,3,1,1,1	https://ntp.niehs.nih.gov/sites/default/files/ntp/htdocs/lt_rpts/tr558.pdf
Tris(chloropropyl) phosphate	TCPP	13674-84-5	DTXSID5026259	18.75, 37.5, 75, 150, 300, 600, 1000, 2000	395	789	2,2,2,2,2,3,1,1	https://www.ncbi.nlm.nih.gov/books/NBK592952/
α,β-Thujone	THU	76231-76-0	DTXSID3040774	1.5, 3, 6.25, 12.5, 25, 50, 100, 200	50		2,2,2,2,2,2,3,3	https://ntp.niehs.nih.gov/sites/default/files/ntp/htdocs/lt_rpts/tr570.pdf

## Sheet: File S3 Biomarker TALs
From Hill et al., 2020
	Genotoxicity	AhR	CAR	ER	PPARa	Cytotoxicity
TG-All	4.39	4.05	7.2	2.3098	4.16115	3.69
DM-All	4.4437	5.63827	9.95861	5.24	5.22	5.25964
